# Supplementary material
Source: publisher site journal article supplement (https://www.dovepress.com/article/306874)
Supplement: Supplementary file 1 [file get_supplementary_file.php]

**Appendix 1**

Search strategy

| **CINAHL** |
| --- |
| S1. (MH "Stigma")  S2. (MH "Shame")  S3. TI "shame*"  S4. TI "stigma*"  S5. TI "social stigma*"  S6. AB "shame*"  S7. AB "stigma*"  S8. AB "social stigma*"  S9. S1 OR S2 OR S3 OR S4 OR S5 OR S6 OR S7 OR S8  S10. (MH "Pulmonary Disease, Chronic Obstructive+")  S11. TI "Chronic obstructive pulmonary disease*"  S12. TI "COPD*"  S13. AB "Chronic obstructive pulmonary disease*"  S14. AB "COPD*"  S15. S11 OR S12 OR S13 OR S14  S16. S9 AND S15  Limiters - Published Date: -20201231 |
| **PsycINFO** |
| S1. DE "stigma"  S2. DE "social stigma"  S3. DE "shame"  S4. TI "stigma*"  S5. TI "social stigma*"  S6. TI "shame*"  S7. AB "stigma*"  S8. AB "social stigma*"  S9. AB "shame*"  S10. S1 OR S2 OR S3 OR S4 OR S5 OR S6 OR S7 OR S8 OR S9  S11. DE "chronic obstructive pulmonary disease"  S12. TI "chronic obstructive pulmonary disease*"  S13. AB "chronic obstructive pulmonary disease*"  S14. TI "COPD*"  S15. AB "COPD*"  S16. S11 OR S12 OR S13 OR S14 OR S15  S17. S10 AND S16  Limiters - Published Date: -20201231 |
| **PubMed** |
| #1. "social stigma"[MeSH Terms]  #2. "shame"[MeSH Terms]  #3. "stigma*"[Title/Abstract]  #4. "shame*"[Title/Abstract]  #5. "social stigma*"[Title/Abstract]  #6. #1 OR #2 OR #3 OR #4 OR #5  #7. "pulmonary disease, chronic obstructive"[MeSH Terms]  #8. "copd*"[Title/Abstract]  #9. "chronic obstructive pulmonary disease*"[Title/Abstract]  #10. #7 OR #8 OR #9  #11. #6 AND #10  Filters: Publication date to 2020/12/31 |
| **Scopus** |
| #1. TITLE-ABS-KEY ( "stigma*" )  #2. TITLE-ABS-KEY ( "social stigma*" )  #3. TITLE-ABS-KEY ( "shame*" )  #4. #1 OR #2 OR #3  #5. TITLE-ABS-KEY ( "copd*" )  #6. TITLE-ABS-KEY ( "chronic obstructive pulmonary disease*" )  #7. #5 OR #6  #8. #4 AND #7 |

**Appendix 2**

Shaw et al26(pp107-110)’s quality assessment checklist for quantitative studies

| Criteria | Yes (2/good) | Partial (1/fair) | No (0/poor) | N/A |
| --- | --- | --- | --- | --- |
| ***Study aims*** | | | | |
| 1. Is the hypothesis/aim/   objective of the study clearly and sufficiently described? | Easily identified in introduction/methods. Specifies purpose, subjects/target population, and specific interventions/associations  under investigation | Vague/incomplete reporting or some Information has to be gathered from parts of the paper other than the introduction/  background/objective sections | Question or objective not  reported/incomprehensible |  |
| ***Study design and sample characteristics*** | | | | |
| 1. Is the study design well described and appropriate?   (If study question not given, infer from conclusions) | Design easily identified, well described and appropriate | Design and/or study question not clearly described or design only partially addresses study question | Design does not answer study question or design is poorly described |  |
| 1. Is the method of patient/control group selection described and appropriate? | Described and appropriate. Inclusion/exclusion criteria described and defined | Selection methods (and inclusion/ exclusion criteria) not completely described but no obvious inappropriateness or selection strategy likely introduces bias but not enough to seriously distort results | No information/  inappropriate information provided or selection bias that likely distorts results |  |
| 1. Are the characteristics of patient/control group(s) clearly described (ie, age range, health characteristic/s)? | Sufficient relevant demographic information. Reproducible criteria used to categorize participants clearly defined | Poorly defined criteria or incomplete demographic information | No baseline/demographic information provided |  |
| 1. Are caregiver characteristics clearly described (ie, age, gender, relationship to care recipient, time spent caring)? | Sufficient relevant demographic information. Reproducible criteria used to categorize participants clearly defined | Poorly defined criteria or incomplete demographic information | No baseline/demographic information provided |  |
| 1. Were patients/participants randomized to intervention groups? | If randomization appropriate: evidence of randomization with a description of the method used (eg, random number tables, block design) | Randomization mentioned but method is not (ie may be possible that randomization was not carried out) | Random allocation not mentioned although it would have been feasible and appropriate (and was possibly carried out) | Study has no control group, ie, observational/ survey/case–control study, or adequate justification for non-randomization given |
| 1. For RCTs only   Was randomization/ allocation concealed from patients? | Evidence that next allocation was concealed from both parties (recruiter and patient/carer) at the point of consent (eg, remote randomization) | Allocation concealment reported but not described | Allocation concealment would have been possible (and was possibly carried out) but not reported | Allocation concealment not possible because of study design (eg, cluster randomized trial) |
| 1. Have the characteristics of patients lost to follow-up been described? | Losses adequately reported and not likely to affect results | Losses not well reported, but small and not likely to affect results | No information or losses large and likely to affect results | No patients lost to follow-up |
| 1. Are intervention(s) clearly described? | Defined and reproducible | Partially defined but insufficient detail to reproduce design | Not described |  |
| ***Data analysis and results*** | | | | |
| 1. Are the main outcomes to be measured clearly described in the introduction/methods? | Defined and measured according to reproducible criteria | Definition leaves room for subjectivity or not sure (ie, not reported in detail, but probably acceptable) or precise definition(s) are missing, but no evidence of major problems or instrument/mode of assessment(s) not reported | Main outcomes first mentioned in results section or measures not defined/inconsistent/poorly defined |  |
| 1. If possible, was an attempt made to blind those measuring the main outcomes of the intervention? | Assessor blind to intervention/study group | Inadequate blinding, ie, assessor may have been aware of the group that the participant was assigned to | No attempt made to blind assessor | Not possible/ appropriate, eg, observational/before-and-after study |
| 1. Are population characteristics (if measured and described) controlled for and adequately described? | Appropriate control at design/ analysis stage or randomized study with comparable baseline characteristics | Incomplete control/description or not considered but unlikely to seriously influence results | Not controlled for and likely to seriously influence results |  |
| 1. Are the main findings clearly described? | Simple outcome data (eg, mean/ prevalence) reported for all major findings | Incomplete or inappropriate descriptive statistics | No/inadequate descriptive statistics |  |
| 1. Are methods of analysis adequately described and appropriate? | Described and appropriate | Not reported but probably appropriate or some tests appropriate, some not | Methods not described and cannot be determined |  |
| 1. Are estimates of variance reported for the main results? | Appropriate estimates provided (SD/SE, confidence intervals) | Undefined or estimates provided for some but not all outcomes | No information |  |
| 1. In trials/cohort studies do analyses adjust for different lengths of follow-up, or in case–control studies is the time between intervention and outcome the same for cases/ controls? | Different lengths of follow-up adjusted for (eg, survival analysis) and adequately described | Different lengths of follow-up probably adjusted for but not adequately described | Differences in follow-up ignored | Cross-sectional design or same length of follow-up |
| 1. If appropriate, were data analyzed according to ITT principle? | All participant data analyzed regardless of adherence to protocol or continuation in trial | Attempt made to analyze data according to ITT principle, but inappropriate method or some participants not included | No attempt made to carry out ITT analysis | Design not appropriate for ITT (eg, cross-sectional data) |
| ***Conclusions*** | | | | |
| 1. Are the conclusions supported by the results? | All conclusions supported by data | Some of the major conclusions supported by data, some not or speculative interpretations are not indicated as such | None/few of the major conclusions supported by the data |  |

**Note:** Reproduced from Shaw C, McNamara R, Abrams K, et al. Systematic review of respite care in the frail elderly. Health Technol Assess. 2009;13(20):1–246. doi:10.3310/hta13200.26

**Abbreviations:** ITT, intention to treat; RCT, randomized controlled trial; SD, standard deviation; SE, standard error

**Appendix 3**

Shaw et al26(pp111-113)’s quality assessment checklist for qualitative studies

| Criteria | Yes (2/good) | Partial (1/fair) | No (0/poor) |
| --- | --- | --- | --- |
| ***Study aims and context*** | | | |
| 1. Is the research question sufficiently described? | Research question clearly identified by the end of the research process, if not at the outset | Research question or objective is vaguely/incompletely reported | Question or objective is not reported or is incomprehensible |
| 1. Is qualitative method appropriate? | Qualitative method is appropriate for the aims and the qualitative framework is identified and justified | Qualitative method appropriate but the methodological framework unclear or not adequately justified | Qualitative methods inappropriate for the aims |
| 1. Is the setting/context clearly described? | Context/setting is clearly described, permitting the reader to relate the findings to other settings | The context/setting is partially described | The context/setting is not described |
| ***Sampling*** |  |  |  |
| 1. Is the sampling strategy clearly described? | Sampling strategy and rationale clearly described and justified | Sampling strategy not clearly described or not fully justified | Sampling not described |
| 1. Is sampling method likely to recruit all relevant cases? (purposive, theoretical sampling) | Sample includes the full range of relevant, possible cases (more than simple convenience sample) permitting conceptual (rather than statistical) generalizations | Sampling was purposive but does not include the full range of possible cases | No attempt made to sample purposively or theoretically or sampling strategy not described |
| 1. Are relevant characteristics of the sample given? | Relevant details of the characteristics of the sample given | Incomplete details of sample characteristics given | No details of sample characteristics given |
| 1. Is rationale for sample size (eg, data saturation) given | Gives rationale for termination of data collection, eg, data saturation | Reasons for sample size implied or no firm rationale | No reason given for sample size |
| ***Data collection*** |  |  |  |
| 1. Are methods of data collection clearly described? | Data collection methods are systematic and clearly described allowing an audit trail such that procedures could be replicated | Data collection methods not clearly described. Difficult to determine if systematic or replicable | Data collection procedures are not described |
| 1. Is method of data collection appropriate for the research question and paradigm? | Data collection methods are appropriate for the research aims and the methodological and analytical framework | The appropriateness of the data collection methods is unclear | Data collection inappropriate for the aims and methodological framework |
| 1. Has the researcher verified the data (eg, by triangulation)? | More than one method of data collection carried out or more than one analyst involved or other methods of verification employed (eg, member checking or line of questioning during interview) | Unclear whether triangulation or other types of verification used | No triangulation or other methods of verification described |
| ***Data analysis*** |  |  |  |
| 1. Are data analysis methods clearly described? | Systematic analytic method clearly described such that procedures could be replicated | Analytic methods not clearly described | Analytic methods not described |
| 1. Are data analysis methods appropriate? | Analytic methods seem appropriate and are well described | Analytic methods only partially described and/or some concerns about appropriateness | Analytic methods not described and/or appropriate |
| 1. Are competing accounts/deviant data taken into account? | Account given of negative or deviant cases in the analysis | Analysis of deviant or negative cases not clearly described | No account given of negative or deviant cases |
| ***Reflexivity*** |  |  |  |
| 1. To what extent is the researcher reflective? | The researcher explicitly assessed the likely impact of their own personal characteristics and the methods used on the data obtained | Possible sources of influence on the data obtained were mentioned, but the likely impact of the influence was not discussed | No evidence of reflexivity in the report |
| ***Conclusions*** |  |  |  |
| 1. Are the interpretations and conclusions supported by the data? | The interpretations are clearly described and supported by the data and are evidenced by sufficient participant quotes | The conclusions are unclear or only partially supported by the data or there are insufficient raw data to support conclusions | Conclusions are not identified or are felt not to be supported by the data or conclusions are absent |

**Note:** Reproduced from Shaw C, McNamara R, Abrams K, et al. Systematic review of respite care in the frail elderly. Health Technol Assess. 2009;13(20):1–246. doi:10.3310/hta13200.26
